# Supplementary material for: Medium and long-chain structured triacylglycerol enhances vitamin D bioavailability in an emulsion-based delivery system: combination of in vitro and in vivo studies
Source: Royal Society of Chemistry journal article supplement (doi:10.1039/d1fo03407c), 2022-01-01
Supplement: d1fo03407c1.pdf [file d1fo03407c1.pdf]

## Electronic Supplementary Information

### The methods of STG purification

In brief, 50 mL the crude STG and 50 mL of n-hexane were mixed and passed through the column, and then washed through the column by eluting with 150 mL n-hexane. The order of column loading materials was alumina, silicic acid, diatomaceous earth, activated carbon and silica gel (v/v/v/v/v, 5:2:1:2:5). After, the mixtures were collected by using a vacuum rotary evaporator at 37 °C. According to the results of HPLC analysis, most of the by-products have been removed, and the purity of TAG content was above 97%. Then, the total TAG composition of purified STG was analyzed by using UPLC-Q-TOF-MS device (according to 2.3.2), and the purity reached 73.92%. According to the total FFA composition of purified STG, MCT/LCT was prepared by using high purity MCT and LCT (w/w, 1:3).

### Reference

1. V. Cardenia, T. Waraho, M. T. Rodriguez-Estrada, D. J. McClements, E. A. Decker, Antioxidant and pro-oxidant activity behavior of phospholipids in stripped soybean oil-in-water emulsions. *J Am Oil Chem Soc.*, 2011, **88**, 1409-1416.

### **Determination of total FFA composition of lipid digestion products**

The total FFA composition of lipid digestion products were determined using previous methods with slight modifications.<sup>1</sup> First, the small intestine digestion products were kept at 100 °C for 10 min. 2ml of chloroform and 1 mL methyl alcohol solution were added into tubes and vortexed for 5 min. Subsequently, the tubes were centrifuged for 10 min at 4000 rpm, and the organic phase was collected, which was then extracted at 40 °C using rotary evaporator. The products were isolated using thin-layer chromatography. The developing solvent system consisted of n-hexane, ethyl ether, and acetic acid (50/50/1, v/v/v). One mL of 2,7-dichlorofluorescein ethanol solution was sprayed on the thin layer chromatography plates and measured at a wavelength of 245 nm. Finally, FFA strips were separated and extracted using n-hexane and ethyl ether solution (the ratio of 1:1). The extraction was repeated two times. The tubes were then centrifuged for 1 minute at 10000 rpm. Following that, the supernatant was collected and dried under a nitrogen atmosphere. Two milliliters of n-hexane were added as extracted solvent and vortexed for 3 minutes. After that, 4 mL of NaCl solution was added, followed by collecting the supernatant. Following that, 1 g of anhydrous sodium sulfate was added for removing water. Finally, the tubes were centrifuged for 5 min at 10000 rpm, and the supernatant was absorbed for GC analysis. The detailed GC analysis methodologies were produced based on our previous study.<sup>2</sup>

### **Reference**

1. E. G. Bligh, W. J. Dyer, A rapid method of total lipid extraction and purification, *Can J Physiol Pharm.*, **37**(8), 911-917.

2. X. S. Wang, C. Jiang, W. D. Xu, Z. C. Miu, Q. Z. Jin, X. G. Wang, Enzymatic synthesis of structured triacylglycerols rich in 1,3-dioleoyl-2-palmitoylglycerol and 1-oleoyl-2-palmitoyl-3-linoleoylglycerol in a solvent-free system, *LWT-Food Sci Technol.*, 2020, **118**, 108798.
3. Z. Z. Yang, W. H. Jin, X. Y. Cheng, Z. Dong, M. Chang, X. S. Wang, Enzymatic enrichment of n-3 polyunsaturated fatty acid glycerides by selective hydrolysis, *Food Chem.*, 2021, **346**, 128743.

### **The methods of *in vitro* digestion assay**

Initial phase: The VitD nanoemulsions were diluted 10 times with 5 mM phosphate buffered saline (pH=7). Gastric phase: Gastric digestion was accomplished by mixing the samples with simulated gastric fluid (SGF) at 1:1 ratio. After adjusting the pH of the resulting mixture to 2.5, the sample was stirred at 37 °C for 120 min. Small intestine phase: 60 mL of gastric phase products were added into a pH-stat automatic device (Hanon, T860) that maintained a constant pH of 7.0 by adding NaOH. Afterwards, 3 mL of simulated intestine fluid, 7 mL of bile salt mixture, and 5 mL of pancreatic lipase were added to the SGF-sample mixture. The final mixture was adjusted to pH 6.9995 to 6.999 (using 0.1 M NaOH) and incubated for 120 min at 37°C. During the 120 min digestion period, the automatic titration unit (Hanon T860, Shandong, China) with a pH-stat programming to keep the pH at 7 was used with NaOH (0.1 M) as the titrant solution for monitoring the FFA release rate.

### **Reference**

1. A. Brodkorb, L. Egger, M. Alming, P. Alvito, R. Assuncao, S. Ballance, T. Bohn, C. Bourlieu-Lacanal, R. Boutrou, F. Carriere, A. Clemente, M. Corredig, D. Dupont, C. Dufour, C. Edwards, M. Golding, S. Karakaya, B. Kirkhus, S. Le Feunteun, U. Lesmes, A. Macierzanka, A. R. Mackie, C. Martins, S. Marze, D. J. McClements, O. Menard, M. Minekus, R. Portmann, C. N. Santos, I. Souchon, R. P. Singh, G. E. Vegarud, M. S. J. Wickham, W. Weitschies, I. Recio, INFOGEST static *in vitro* simulation of gastrointestinal food digestion. *Nat Protoc.*, 2019, **14**, 991-1014.

**The detailed compositions of different experimental diets**

| <b>Component</b>                | <b>Standard diet based in<br/>AIN-93M</b> |              | <b>VitD deficiency diet<br/>based in AIN-93M</b> |              |
|---------------------------------|-------------------------------------------|--------------|--------------------------------------------------|--------------|
|                                 | <b>gm%</b>                                | <b>kcal%</b> | <b>gm%</b>                                       | <b>kcal%</b> |
| Protein                         | 14.2                                      | 14.7         | 14.2                                             | 14.7         |
| Carbohydrate                    | 73.1                                      | 75.9         | 73.1                                             | 75.9         |
| Fat                             | 4.0                                       | 9.4          | 4.0                                              | 9.4          |
| Total                           | -                                         | 100.0        | -                                                | 100.0        |
| kcal/gm                         | 3.85                                      | -            | 3.85                                             | -            |
| <b>Ingredient</b>               |                                           |              |                                                  |              |
| Casein, 30 Mesh                 | 140                                       | 560          | 140                                              | 560          |
| L-Cystine                       | 1.8                                       | 7.2          | 1.8                                              | 7.2          |
| Corn Starch                     | 495.692                                   | 1983         | 495.692                                          | 1983         |
| Maltodextrin                    | 125                                       | 500          | 125                                              | 500          |
| Sucrose                         | 100                                       | 400          | 100                                              | 400          |
| Cellulose                       | 50                                        | 0            | 50                                               | 0            |
| Soybean Oil                     | 40                                        | 360          | 40                                               | 360          |
| Mineral Mix S10022G             | 35                                        | 0            | 35                                               | 0            |
| Vitamin Mix V10037              | 10                                        | 40           | -                                                | -            |
| Vitamin Mix<br>V10037(no Vit D) | -                                         | -            | 10                                               | 40           |
| Choline Bitartrate              | 2.5                                       | 0            | 2.5                                              | 0            |
| <b>Total</b>                    | <b>1000</b>                               | <b>3850</b>  | <b>1000</b>                                      | <b>3850</b>  |

### The body weight change during experiments

|             | 1         | 2        | 3     | 4     | 5     | 6      | 7        |
|-------------|-----------|----------|-------|-------|-------|--------|----------|
| STG         | 25.32±0.9 | 25.46±1. | 25.48 | 25.40 | 25.59 | 25.30± | 25.65±1. |
|             | 3         | 42       | ±1.55 | ±1.69 | ±1.81 | 1.52   | 11       |
| MCT/LCT     | 25.44±0.7 | 25.86±0. | 25.72 | 25.48 | 25.95 | 25.67± | 25.66±0. |
|             | 4         | 92       | ±0.54 | ±0.48 | ±0.08 | 0.53   | 44       |
| STG+VitD    | 25.65±0.6 | 26.39±0. | 26.40 | 26.22 | 26.47 | 25.93± | 26.30±0. |
|             | 0         | 52       | ±0.31 | ±0.33 | ±0.43 | 0.34   | 48       |
| MCT/LCT+Vit | 25.42±1.4 | 25.49±0. | 25.67 | 25.13 | 25.37 | 25.34± | 25.34±0. |
| D           | 6         | 99       | ±0.98 | ±1.00 | ±0.72 | 1.07   | 60       |

### The food consumption (g)

| Groups <sup>a</sup> | 2nd <sup>b</sup> | 4th <sup>c</sup> | 7th <sup>d</sup> |
|---------------------|------------------|------------------|------------------|
| STG                 | 50.39 g          | 46.32 g          | 57.47 g          |
| MCT/LCT             | 50.40 g          | 45.40 g          | 62.75 g          |
| STG+VitD            | 53.85 g          | 47.38 g          | 56.23 g          |
| MCT/LCT+VitD        | 52.57 g          | 50.11 g          | 58.57 g          |

a: the mice number in each group is 7

b: 2nd means the food consumption in first two days

c: 4th means the sum of food consumption in third day and forth day

d: 7th means the food consumption in last three days
